# Supplementary material
Source: publisher site journal article supplement (https://www.spandidos-publications.com/3849/downloadSupplementary)
Supplement: Supplementary file 1 [file downloadSupplementary]

## Sheet: Sheet1
Table SI. Circulating miRNA expression in post- vs. pre-operative samples from patients with CRC with and without neoadjuvant therapy.
A, Patients with CRC and neoadjuvant therapy (n=60).
miRNA	Fold-change (IQR)	Tumor type (P-value)	Tumor stage (P-value)	pT (P-value)	pN (P-value)	pM (P-value)	Grade (P-value)	Microsatellite stability (P-value)	Neoadjuvant therapy (P-value)	Relapse (P-value)
miR-106a-5p	1.06 (0.75, 1.35)	0.069	0.069	0.9	0.2	0.2	0.3	0.7	0.9	0.3
miR-210-5p	1.07 (0.40, 2.68)	0.4	0.4	0.8	0.6	0.5	0.4	0.8	0.012a	0.4
miR-155-5p	1 (1, 3)	0.7	0.8	0.6	>0.9	0.6	>0.9	0.4	>0.9	>0.9
miR-21-5p	1.11 (0.86, 1.40)	0.8	0.7	>0.9	0.5	0.4	0.3	0.2	0.3	0.12
miR-103a-3p	1.00 (1.00, 1.00)	0.3	0.3	0.8	0.5	0.2	0.4	0.7	0.2	>0.9
miR-191-5p	1.16 (0.92, 1.44)	0.5	0.075	0.8	0.6	0.4	0.6	0.062	0.9	0.7
miR-16-5p	0.81 (0.58, 1.09)	0.4	0.9	0.3	0.14	0.7	0.8	0.2	0.2	0.3
B, Patients with CRC without neoadjuvant therapy (n=54).
miRNA	Fold-change (IQR)	Tumor type (P-value)	Tumor stage (P-value)	pT (P-value)	pN (P-value)	pM (P-value)	Grade (P-value)	Microsatellite stability (P-value)	Neoadjuvant therapy (P-value)	Relapse (P-value)
miR-106a-5p	1.06 (0.69, 1.41)	0.083	0.033a	0.8	0.3	0.3	0.3	0.7	---	0.4
miR-210-5p	0.88 (0.37, 2.17)	0.5	0.13	0.8	0.4	0.7	0.4	0.7	---	>0.9
miR-155-5p	1 (1, 4)	0.6	0.6	0.5	0.8	0.3	>0.9	0.4	---	>0.9
miR-21-5p	1.15 (0.88, 1.41)	0.9	0.5	>0.9	0.8	0.5	0.3	0.2	---	0.12
miR-103a-3p	1.00 (1.00, 1.02)	0.4	0.4	0.6	0.5	0.5	0.4	0.6	---	0.8
miR-191-5p	1.16 (0.92, 1.40)	0.6	0.14	0.8	0.2	0.3	0.6	0.065	---	>0.9
miR-16-5p	0.77 (0.56, 1.06)	0.4	>0.9	0.072	0.13	0.5	0.8	0.2	---	0.5
Data assessed by Wilcoxon rank-sum test or Fisher's exact test. miR, microRNA; IQR, interquartile range; p, pathological; N, node; T, tumor; M, metastasis; CRC, colorectal cancer.
